# Supplementary material for: Identification of microRNAs implicated in modulating resveratrol-induced apoptosis in porcine granulosa cells
Source: Front Cell Dev Biol. 2023 May 5;11:1169745. doi: 10.3389/fcell.2023.1169745 (PMC10211428; doi:10.3389/fcell.2023.1169745)
Supplement: Supplementary file 6 [file Table8.XLS]

## Sheet: Sheet1
Table S8. The primers of reference gene and miRNAs
Transcripts	Primers
ocu-miR-206-3p	F	CGTCCTGGAATGTAAGGAAGT
	RT	GTCGTATCCAGTGCAGGGTCCGAGGTATTCGCACTGGATACGACccacac
ocu-miR-1-3p	F	ACACTCCAGCTGGGtggaatgtaaagaagt
	RT	CTCAACTGGTGTCGTGGAGTCGGCAATTCAGTTGAGatacatac
ocu-miR-379-5p	F	ACACTCCAGCTGGGTGGTAGACTATGGAA
	RT	CTCAACTGGTGTCGTGGAGTCGGCAATTCAGTTGAGCCTACGTT
ocu-miR-127-3p	F	ACACTCCAGCTGGGTGGTAGACTATGGAA
	RT	CTCAACTGGTGTCGTGGAGTCGGCAATTCAGTTGAGCCTACGTT
ocu-miR-26a-5p	F	ACACTCCAGCTGGGTTCAAGTAATCCAGGA
	RT	CTCAACTGGTGTCGTGGAGTCGGCAATTCAGTTGAGCCTACGTT
ocu-miR-21-5p	F	ACACTCCAGCTGGGTAGCTTATCAGACTGATG
	RT	CTCAACTGGTGTCGTGGAGTCGGCAATTCAGTTGAGAGTCAACA
ocu-miR-532-5p	F	ACACTCCAGCTGGGCATGCCTTGAGTGT
	RT	CTCAACTGGTGTCGTGGAGTCGGCAATTCAGTTGAGacagtcct
ocu-miR-381-3p	F	ACACTCCAGCTGGGTATACAAGGGCAAGCT
	RT	CTCAACTGGTGTCGTGGAGTCGGCAATTCAGTTGAGacagagag
novel_38	F	ACACTCCAGCTGGGcacTggcggggTgTg
	RT	CTCAACTGGTGTCGTGGAGTCGGCAATTCAGTTGAGccacagag
novel_3	F	ACACTCCAGCTGGGTgagaTgaagcacTgT
	RT	CTCAACTGGTGTCGTGGAGTCGGCAATTCAGTTGAGCTAGCTAC
ocu-miR-873-3p	F	ACACTCCAGCTGGGgagactgatgagttcc
	RT	CTCAACTGGTGTCGTGGAGTCGGCAATTCAGTTGAGttcccggg
ocu-miR-105b-5p	F	ACACTCCAGCTGGGtgaaatgctcaaacatc
	RT	CTCAACTGGTGTCGTGGAGTCGGCAATTCAGTTGAGaccactga
ocu-miR-185-3p	F	ACACTCCAGCTGGGAGGGGCTGGCTTT
	RT	CTCAACTGGTGTCGTGGAGTCGGCAATTCAGTTGAGaccagaga
ocu-miR-370-3p	F	ACACTCCAGCTGGGGCCTGCTGGGGTGG
	RT	CTCAACTGGTGTCGTGGAGTCGGCAATTCAGTTGAGaccactga
U6	F	ATGTTCATCCAGTTGTCAC
	RT	CTCAGAATCACCCAATGC
